# Supplementary material
Source: PubMed Central journal article supplement (PMC545542)

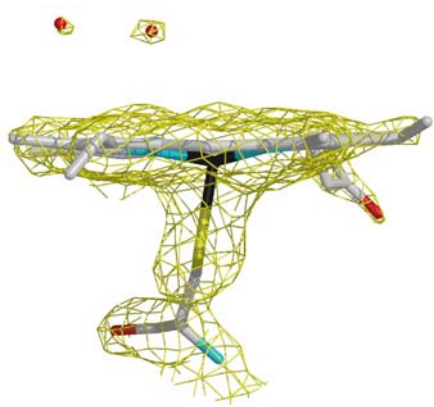

Supplement: pnas_102_3_594__1.pdf [file pnas_102_3_594__1.pdf]
